# Supplementary material for: SMAD3 promotes ELK3 expression following transforming growth factor β-mediated stimulation of MDA-MB231 cells
Source: PubMed Central journal article supplement — Oncol Lett. 2020 Feb 6;19(4):2749–54. doi: 10.3892/ol.2020.11375 (PMC7068580; doi:10.3892/ol.2020.11375), 2020-02-06
Supplement: Supplementary_Data.pdf [file Supplementary_Data.pdf]

Table SI. Plasmids used in the present study.

| No | Name                          | Information                                                 |
|----|-------------------------------|-------------------------------------------------------------|
| 1  | Flag-SMAD3                    | The plasmid was obtained from Dr Seung-Jin Kim <sup>a</sup> |
| 2  | CA-ALK5                       | The plasmid was obtained from Dr Seung-Jin Kim <sup>a</sup> |
| 3  | pGL3-ELK3 promoter (-92~+345) | PCR amplified ELK3 promoter was subcloned into pGL3         |

<sup>a</sup>Graduate School of Convergence Science and Technology, Seoul National University. CA-ALK5, constitutively active form of TGF $\beta$  receptor-I

Table SII. siRNAs used in the present study.

| No | Name                      | Supplier                       | Cat. no. |
|----|---------------------------|--------------------------------|----------|
| 1  | Nonspecific siRNA control | Bioneer Corporation            | SN-1003  |
| 2  | TGF $\beta$ R1 siRNA      | Thermo Fisher Scientific, Inc. | 138758   |
| 3  | SMAD2 siRNA               | Bioneer Corporation            | 4087     |
| 4  | SMAD3 siRNA               | Bioneer Corporation            | 4088     |

siRNA, small interfering RNA; TGF $\beta$ R1, TGF $\beta$  receptor R1.

Table SIII. PCR primers used in the present study.

| No | Gene                                     | Forward primer, 5'-3'  | Reverse primer, 5'-3'  |
|----|------------------------------------------|------------------------|------------------------|
| 1  | <i>GAPDH</i> RT-qPCR primer              | ACCCAGAAGACTGTGGATGG   | TGTAGACGGCAGGTCAGGTC   |
| 2  | <i>ELK3</i> RT-qPCR primer               | ACCCAAAGGCTTGGAATCT    | TGTATGCTGGAGAGCAGTGG   |
| 3  | <i>SNAIL</i> RT-qPCR primer              | GCAAATACTGCAACAAGG     | GCACTGGTACTTCTTGACA    |
| 4  | <i>ELK3</i> Chip primer (+252 ~ +352 bp) | TGTCAGCATGGAAAGTCGGG   | ACAGGCAGAAGCCCTGTTAC   |
| 5  | <i>ID1</i> Chip primer (-951 ~ -866 bp)  | AGTCCGTCCGGGTTTTATGAAT | CGGTCTGTGTCAGCGTCTGAAC |

RT-qPCR, reverse transcription-quantitative PCR.

Table SIV. Antibodies used in the present study.

| A, Primary antibodies                    |                                                                                  |                                            |           |
|------------------------------------------|----------------------------------------------------------------------------------|--------------------------------------------|-----------|
| No                                       | Name                                                                             | Supplier                                   | Cat. no.  |
| 1                                        | GAPDH                                                                            | Santa Cruz Biotechnology, Inc.             | sc-166574 |
| 2                                        | $\alpha$ -Tubulin                                                                | Abcam                                      | Ab7291    |
| 3                                        | ELK3                                                                             | Novus Biologicals, LLC                     | NBP201264 |
| 4                                        | SMAD2/3                                                                          | Cell Signaling Technology, Inc.            | 8685      |
| 5                                        | Phospho SMAD3                                                                    | Cell Signaling Technology, Inc.            | 3108      |
| 6                                        | TGF $\beta$ R1                                                                   | Abcam                                      | Ab31013   |
| 7                                        | LaminB1                                                                          | Santa Cruz Biotechnology, Inc.             | sc-374015 |
| B, Secondary antibodies                  |                                                                                  |                                            |           |
| No                                       | Name                                                                             | Supplier                                   | Cat. no.  |
| 1                                        | Goat anti-Mouse IgG (H+L)<br>Cross-Adsorbed Secondary Antibody, Alexa Fluor 488  | Invitrogen; Thermo Fisher Scientific, Inc. | A-11001   |
| 2                                        | Goat anti-Rabbit IgG (H+L)<br>Cross-Adsorbed Secondary Antibody, Alexa Fluor 594 | Invitrogen; Thermo Fisher Scientific, Inc. | A-11012   |
| 3                                        | Goat anti-rabbit IgG-HRP                                                         | Santa Cruz Biotechnology, Inc.             | sc-2004   |
| 4                                        | Goat anti-mouse IgG-HRP                                                          | Santa Cruz Biotechnology, Inc.             | sc-2005   |
| TGF $\beta$ R1, TGF $\beta$ receptor R1. |                                                                                  |                                            |           |
